# Supplementary material for: Clinical, Neurophysiological, Radiological, Pathological, and Genetic Features of Dysferlinopathy in Saudi Arabia
Source: Frontiers journal article supplement (doi:10.3389/fnins.2022.815556), 2022-02-22
Supplement: Table_1.pdf [file Table_1.pdf]

**Supplementary Table: Sociodemographic, Clinical, Neurophysiological, Radiological, Pathological and Biochemical characteristics of Dysferlinopathies in Saudi Arabia (n=53)**

| S. No . | Family number | Gender /Age | Province/ Bedoin | Family History | Age of Onset | Initial Symptoms                                                         | Phenotype     | Follow Up in years | Functional status                  | CK level (N <195 U/L) | AST (N <45 ) | ALT (N <45 ) | COMMENTS                                     |
|---------|---------------|-------------|------------------|----------------|--------------|--------------------------------------------------------------------------|---------------|--------------------|------------------------------------|-----------------------|--------------|--------------|----------------------------------------------|
| 1       | F1 A          | F/46        | W/ YES           | YES            | 14           | Difficulty in getting from a chair                                       | LGMD          | 6Y                 | Wheelchaired Since 30 years of age | 1897                  | 65           | 50           | Asymmetric                                   |
| 2       | F2 A          | M/41        | E/NO             | NO             | 15           | Difficulty standing from a chair, walking difficulty, and frequent falls | LGMD          | 6Y                 | Wheelchaired since 25years of age  | 9064                  | Not done     | 188          | Received steroid for 7 years.                |
| 3       | F3 A          | F/48        | C/YES            | Yes            | 22           | Exercise-related pain and mild proximal weakness                         | Proximodistal | 10Y                | Wheelchaired at age 29Y            | 1868                  | Not done     | Not done     | Marked intrafamilial variability             |
| 4       | F3 B          | M/40        | C/YES            | YES            | 17           | Exercise-related pain and difficulties in running                        | MM            | 10Y                | Wheelchaired at age 32             | 8713                  | Not done     | Not done     | Asymmetric. Marked intrafamilial variability |
| 5       | F 3 C         | M/35        | C/YES            | YES            | 16           | Proximal muscle weakness and backache                                    | Proximodistal | 10Y                | Wheelchaired at age 25             | 9500                  | Not done     | Not done     | Marked intrafamilial variability             |
| 6       | F3 D          | F/34        | C/YES            | YES            | 17           | Difficulties in getting from a chair                                     | LGMD          | 10Y                | Ambulating                         | 10000                 | Not done     | Not done     | Asymmetric. Marked intrafamilial variability |
| 7       | F4 A          | M/26        | E/NO             | NO             | 12           | Difficulty walking up the stairs                                         | LGMD          | 5Y                 | Ambulating                         | 5000                  | 78           | 78           | Wrongly diagnosed as Becker for many years.  |

|    |       |      |       |     |    |                                                                              |      |     |                     |       |          |          |                                                                                               |
|----|-------|------|-------|-----|----|------------------------------------------------------------------------------|------|-----|---------------------|-------|----------|----------|-----------------------------------------------------------------------------------------------|
|    |       |      |       |     |    |                                                                              |      |     |                     |       |          |          | Mild phenotype & Slowly progressive                                                           |
| 8  | F 5A  | M/41 | SW/NO | YES | 19 | Distal weakness                                                              | MM   | 8Y  | Ambulating with aid | 8459  | 95       | 96       | Asymmetric. Marked intrafamilial variability                                                  |
| 9  | F5 B  | M/33 | SW/NO | YES | 17 | Gait problems and difficulties in getting from a chair                       | LGMD | 8Y  | Ambulating with aid | 8506  | Not done | Not done | Marked intrafamilial variability                                                              |
| 10 | F6 A  | F/42 | W/NO  | YES | 15 | Lumbar back pain and Progressive Lower limb weakness                         | MM   | 5 Y | Ambulating          | 7387  | 76       | 81       |                                                                                               |
| 11 | F7 A  | M/29 | C/YES | YES | 17 | Distal weakness and difficulties in getting from a chair                     | MM   | 6Y  | Ambulating with aid | 12715 | 134      | 164      | Asymmetric. Received steroid for 4 years                                                      |
| 12 | F7 B  | F/27 | C/YES | YES | 16 | Weakness on walking on toes                                                  | MM   | 6Y  | Ambulating with aid | 6000  | Not done | Not done | Diabetes                                                                                      |
| 13 | F 8 A | M/38 | SW/NO | NO  | 17 | Difficulty playing football & frequent injuries during the game              | MM   | 13Y | Ambulating with aid | 9120  | Not done | 238      |                                                                                               |
| 14 | F9 A  | F/39 | W/YES | YES | 16 | Exercise-related pain. Joint pain and weakness with fine motor hand movement | MM   | 5Y  | Ambulating          | 1336  | 62       | 68       | Wrongly diagnosed as psoriatic arthritis, then diagnosis changed to dermatomyositis. Received |

|    |        |      |       |                                 |    |                                                      |               |     |                                     |       |          |          |                                                                                 |
|----|--------|------|-------|---------------------------------|----|------------------------------------------------------|---------------|-----|-------------------------------------|-------|----------|----------|---------------------------------------------------------------------------------|
|    |        |      |       |                                 |    | and knee-buckling.                                   |               |     |                                     |       |          |          | adalimumab, prednisone, methotrexate, and IVIG for 4 years with no improvement. |
| 15 | F9 B   | F/34 | W/YES | YES                             | 25 | Gradually progressive difficulty climbing stairs     | LGMD          | 4   | Ambulating                          | 2099  | 70       | 81       | S/P Ebstein anomaly repair.                                                     |
| 16 | F10 A  | M/54 | W/NO  | YES                             | 17 | Back pain. Shaking arms when carrying heavy objects. | MM            | 6 Y | Ambulating.                         | 2341  | 70       | 90       | A mild form of Muscular Dystrophy. intrafamilial variability                    |
| 17 | F10 B  | F/51 | W/NO  | YES                             | 18 | Lower limb weakness                                  | Proximodistal | 4 Y | Wheel-chaired since 31 years of age | 3500  | no       | no       | intrafamilial variability                                                       |
| 18 | F11 A  | M/27 | W/NO  | No                              | 16 | Asymptomatic. Hyper CK                               | NO Symptom    | 4   | Ambulating.                         | 4284  | 102      | 186      | N/A                                                                             |
| 19 | F12A   | F/39 | W/YES | NO                              | 10 | Difficulty climbing stairs                           | LGMD          | 8   | Ambulatory with walking aid         | 5557  | 84       | 127      | Hypothyroid                                                                     |
| 20 | F13 A  | M/32 | W/YES | YES                             | 22 | Difficulty carrying heavy objects                    | MM            | 4Y  | Ambulatory with walking aid         | 10000 | 113      | 158      |                                                                                 |
| 21 | F 13 B | F/37 | W/YES | YES, but not genetically tested | 20 | Difficulty climbing stairs                           | MM            | 4   | Wheel chaired at the age of 31      | 11000 | Not done | Not done |                                                                                 |
| 22 | F14 A  | M/44 | C/YES | YES                             | 18 | Back pain and lower extremity weakness               | MM            | 28  | Wheel-chaired since 33 years of age | 8000  | 62       | 102      |                                                                                 |

|    |        |      |       |     |    |                                                                                                                                          |               |      |                                                                    |           |      |       |                                                       |
|----|--------|------|-------|-----|----|------------------------------------------------------------------------------------------------------------------------------------------|---------------|------|--------------------------------------------------------------------|-----------|------|-------|-------------------------------------------------------|
| 23 | F14 B  | M/36 | C/YES | YES | 18 | Back pain and lower extremity weakness                                                                                                   | MM            | 18   | Wheel chaired<br>At the age of 30                                  | 1000<br>0 | 60   | 100   |                                                       |
| 24 | F14 C  | M/34 | C/YES | YES | 16 |                                                                                                                                          | MM            | 16   | Ambulatory with walking aid                                        | 1000<br>0 | 65   | 109   |                                                       |
| 25 | F15 A  | F/36 | W/NO  | NO  | 14 | Weakness on walking                                                                                                                      | MM            | 11 Y | Ambulatory with walking aid                                        | 7700      | 103  | 172   |                                                       |
| 26 | F16 A  | F/56 | SW/NO | YES | 20 | Distal weakness                                                                                                                          | MM            | 26   | Wheel-chaired since 37 years of age                                | 3750      | 84   | 64    | Pancreatitis and Pulmonary Embolism                   |
| 27 | F 16 B | F/50 | SW/NO | YES | 17 | Distal weakness and difficulties in getting from a chair                                                                                 | MM            | 16 Y | Wheelchaired at the age of 35                                      | 7841      | 53   | 119   |                                                       |
| 28 | F17 A  | M/37 | W/YES | NO  | 19 | Difficulty getting up from a chair                                                                                                       | MM            | 9Y   | Ambulatory with walking air                                        | 9959      | 75   | 99    |                                                       |
| 29 | F18 A  | F/34 | SW/NO | YES | 17 | Noticed she has difficulty standing on her toes and walking. Progressed to difficulty standing up from chair and difficulty swallowing?? | Proximodistal | 8 Y  | Ambulatory with walking air                                        | 4567      | 98   | 81    |                                                       |
| 30 | F18 B  | M/36 | SW/NO | YES | 13 | Difficulty climbing stairs and walking with back pain                                                                                    | MM            | 8Y   | Wheelchair since 26 years of age due to frequent falls and serious | 8000      | 91.2 | 159.6 | Deltoid muscle hypertrophy. intrafamilial variability |

|    |        |      |       |     |    |                                                                                                                                             |               |    |                                      |           |     |     |                                                                                                |
|----|--------|------|-------|-----|----|---------------------------------------------------------------------------------------------------------------------------------------------|---------------|----|--------------------------------------|-----------|-----|-----|------------------------------------------------------------------------------------------------|
|    |        |      |       |     |    |                                                                                                                                             |               |    | ligament injuries of both knees.     |           |     |     |                                                                                                |
| 31 | F18 C  | F/35 | SW/NO | YES | 14 | Difficulty running because of knees instability and exercise intolerance                                                                    | Proximodistal | 8Y | Wheel-chair since 27 years of age    | 3600      | 135 | 137 | Deltoid hypertrophy. intrafamilial variability<br>ESR 26H<br>Deltoid hypertrophy               |
| 32 | F19 A  | F/39 | W/YRD | NO  | 15 | Difficulty walking & climbing and descending stairs. Difficulty weakness in upper extremity                                                 | MM            | 9Y | Ambulating                           | 1929      | 27  | 38  |                                                                                                |
| 33 | F 20 A | M/39 | W/NO  | NO  | 25 | Difficulty standing. Diagnosed initially with Polymyositis and received IVIG for 2 years.                                                   | LGMD          | 8Y | Ambulating with aids                 | 4504      | 67  | 100 |                                                                                                |
| 34 | F21 A  | M/30 | C/YES | NO  | 17 | Incidental high CK and mildly elevated liver enzymes for investigation for acne. Diagnosed wrongly as Polymyositis. Given high dose steroid | N/A           | 6Y | Wheel-chaired since 19 years of age. | 2148<br>3 | 318 | 656 | Diagnosed wrongly as Polymyositis. Given high dose steroid then tapering dose. Deltoid sparing |

|    |       |      |        |     |    |                                                                                           |               |     |                                            |      |          |          |                 |
|----|-------|------|--------|-----|----|-------------------------------------------------------------------------------------------|---------------|-----|--------------------------------------------|------|----------|----------|-----------------|
|    |       |      |        |     |    | then tapering dose.<br>Weakness 1 week after pulse therapy.                               |               |     |                                            |      |          |          |                 |
| 35 | F22 A | F/38 | E/YES  | YES | 25 | Difficulty walking stairs and difficulty with walking on wearing heels and frequent falls | Proximodistal | 1YR | Ambulating                                 | 5000 |          |          | Deltoid sparing |
| 36 | F22 B | M/55 | E /YES | YES | 24 | Distal more than proximal weakness                                                        | MM            | 1YR | Wheel-chaired since around 30 years of age | 1900 | Not done | Not done |                 |
| 37 | F22 C | M/49 | E/YES  | YES | 21 | Difficulty climb the stair<br>Difficulty in standing for a long period                    | LGMD          | 1YR | Wheel-chaired since around 30 years of age | 2890 | Not done | Not done |                 |
| 38 | F22 D | F/45 | E/YES  | YES | 20 | Difficulty climb the stair<br>Difficulty in standing for a long period                    | LGMD          | 1YR | Wheel-chaired since around 30 years of age | 1256 | Not done | Not done |                 |
| 39 | F22 E | M/50 | E/YES  | YES | 23 | Difficulty climb the stair<br>Difficulty in standing for a long period                    | LGMD          | 1YR | Wheel-chaired since around 30 years of age | 3000 | Not done | Not done |                 |
| 40 | F23 A | F/61 | C/YES  | YES | 17 | Difficulty climbing stairs                                                                | MM            | 9Y  | Wheelchaired since 30 years of age         | 3000 | Not done | Not done |                 |

|    |       |      |       |     |    |                                                                        |               |    |                                  |       |          |          |                                                                                                                                                   |
|----|-------|------|-------|-----|----|------------------------------------------------------------------------|---------------|----|----------------------------------|-------|----------|----------|---------------------------------------------------------------------------------------------------------------------------------------------------|
| 41 | F23B  | F/54 | C/YES | YES | 18 | Difficulty climbing stairs                                             | MM            | 9Y | Wheelchair since 32 years of age | 1500  | Not done | Not done |                                                                                                                                                   |
| 42 | F23 C | F/53 | C/YES | YES | 13 | Lower back and knee pain. Knee buckling. Frequent falls.               | Proximodistal | 9Y | Wheelchair since 35 years of age | 1916  | 56       | 53       | Wrongly diagnosed Polymyositis and received steroid, methotrexate, IVIG, and Rituximab for 8 years. Deltoid sparing. Hyper-extension of the knees |
| 43 | F24 A | F/38 | E/NO  | NO  | 20 | Limping and recurrent fall                                             | LGMD          | 8Y | Ambulating with aid              | 8496  | 45       | 133      | Hypertrophied deltoid muscle                                                                                                                      |
| 44 | F25 A | M/34 | C/No  | No  | 22 | Difficulty climb the stair<br>Difficulty in standing for a long period | Proximodistal | 9Y | Ambulating                       | 7858  | 114      | 171      |                                                                                                                                                   |
| 45 | F26 A | F/31 | S/NO  | NO  | 15 | Difficulty walking stairs                                              | LGMD          | 12 | Ambulating                       | 302   | 66       | 63       | Dermatomyositis                                                                                                                                   |
| 46 | F27 A | M/22 | S/NO  | NO  | 14 | Difficulty walking stairs                                              | MM            | 2Y | Ambulating                       | 10387 | 215      | 305      | Heterozygous VUS. gene                                                                                                                            |
| 47 | F28 A | M/33 | C/YES | YES | 15 | Difficulty in running                                                  | MM            | 12 | Ambulating                       | 10372 | 194      | 126      |                                                                                                                                                   |
| 48 | F29 A | M/41 | W/YES | YES | 18 | Recurrent falls                                                        | MM            | 19 | Ambulating                       | 12529 | 83       | 198      |                                                                                                                                                   |
| 49 | F30A  | M/41 | C/yes | NO  | 20 | Difficulty walking stairs                                              | LGMD          | 16 | Ambulating                       | 1529  | 30       | 57       |                                                                                                                                                   |
| 50 | F31 A | F/54 | C/NO  | NO  | 23 | Difficulty walking stairs                                              | LGMD          | 16 | Ambulating                       | 1005  | 33       | 24       |                                                                                                                                                   |
| 51 | F32 A | M/37 | C/YES | YES | 14 | Unable to run                                                          | LGMD          | 13 | Ambulating                       | 10000 | Not done | 186      |                                                                                                                                                   |

|           |       |      |       |     |    |               |    |   |            |           |     |     |                                       |
|-----------|-------|------|-------|-----|----|---------------|----|---|------------|-----------|-----|-----|---------------------------------------|
| <b>52</b> | F33 A | M/32 | C/YES | YES | 22 | Unable to run | MM | 1 | Ambulating | 1114<br>1 | 128 | 145 | More weakness<br>in the upper<br>limb |
| <b>53</b> | F33B  | F/29 | C/YES | YES | 18 | Unable to run | MM | 1 | Ambulating | 8856      | 60  | 91  |                                       |
